# Supplementary material for: A new strategy: fermi level control to realize 3D pyramidal NiCo-LDH/ReS2/n-PSi as a high-performance photoanode for the oxygen evolution reaction
Source: Royal Society of Chemistry journal article supplement (doi:10.1039/d1tc05863k), 2022-01-01
Supplement: d1tc05863k1.pdf [file d1tc05863k1.pdf]

## Supplementary Material

### **A new strategy: Fermi level control to realize 3D pyramidal NiCo-LDH/ReS<sub>2</sub>/n-PSi as a high- performance photoanode for oxygen evolution reaction**

Yingzhi Zhao<sup>a,1</sup>, Weiming Song<sup>d,1</sup>, Zhiyong Li<sup>d</sup>, Zhang Zhang<sup>b,d\*</sup>, Guofu Zhou<sup>a,b,c\*</sup>

*a Guangdong Provincial Key Laboratory of Optical Information Materials and  
Technology, South China Academy of Advanced Optoelectronics, South China Normal  
University, Guangzhou 510006, P. R. China;*

*b National Center for International Research on Green Optoelectronics, South China  
Normal University, Guangzhou 510006, P. R. China;*

*c Academy of Shenzhen Guohua Optoelectronics, Shenzhen 518110, P. R. China;*

*d South China Normal University, South China Academy of Advanced Optoelectronics,  
Institute of Advanced Materials, Guangzhou 510006, Guangdong, Peoples R China.*

<sup>1</sup> Contributed equally to the work.

\* Corresponding authors.

E-mail addresses: z Zhang@scnu.edu.cn (Zhang Zhang); guofu.zhou@m.scnu.edu.cn

(Guofu Zhou);

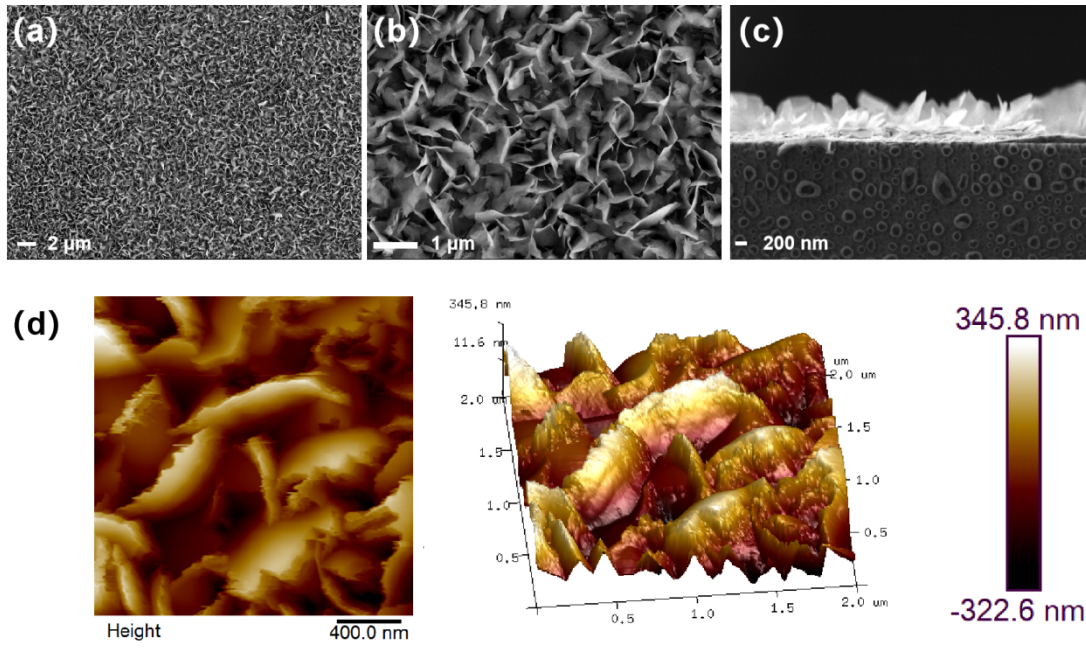

**Figure S1.** Top-view- and cross-sectional SEM images of the (a, b,c) planar structure of  $\text{ReS}_2/\text{n-Si}$ . (d) AFM height- and three-dimensional images of the planar  $\text{ReS}_2/\text{n-Si}$  structure.

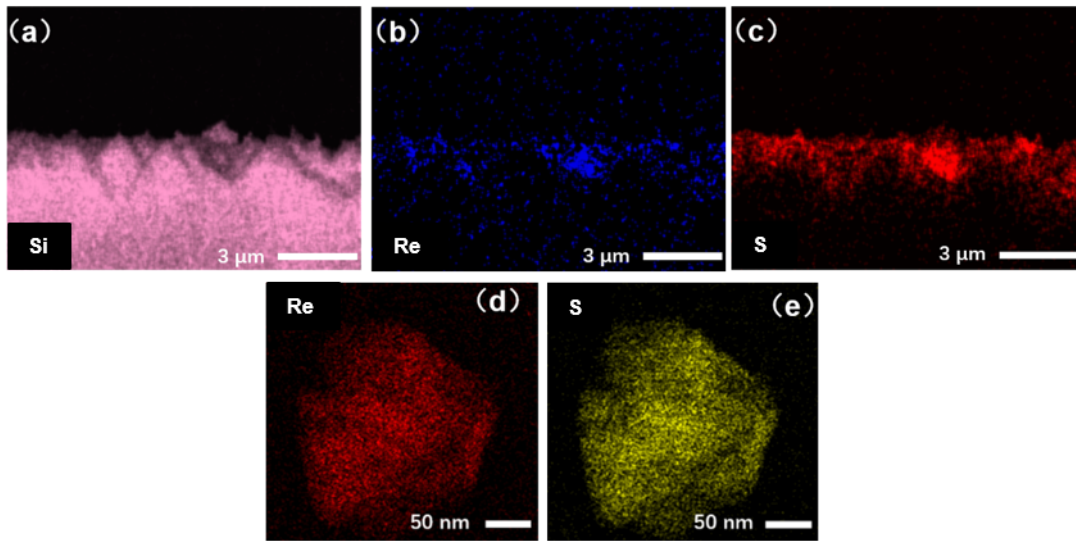

**Figure S2.** (a,b,c) Si, Re, and S elemental mappings from cross-sectional SEM image. (d,e) Re, and S elemental mappings from TEM image.

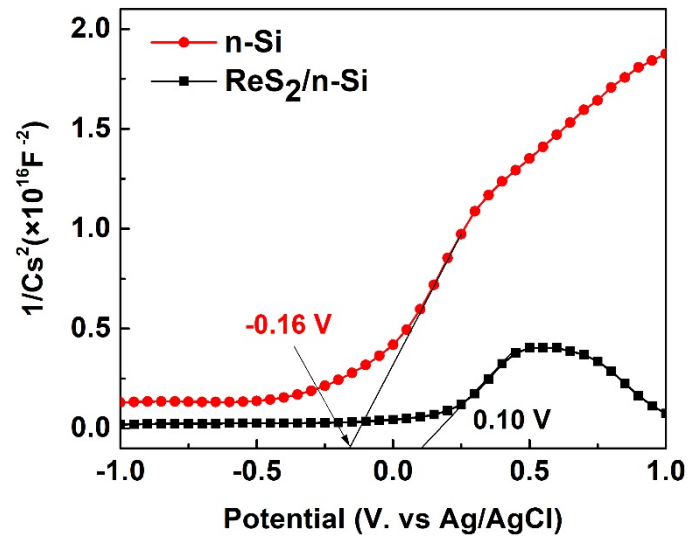

**Figure S3.** Mott-Schottky curve of bare planar n-Si and ReS<sub>2</sub>/n-Si structures. The ReS<sub>2</sub>/n-Si structure is more tend to like a p-n junction because of the p-ReS<sub>2</sub>.

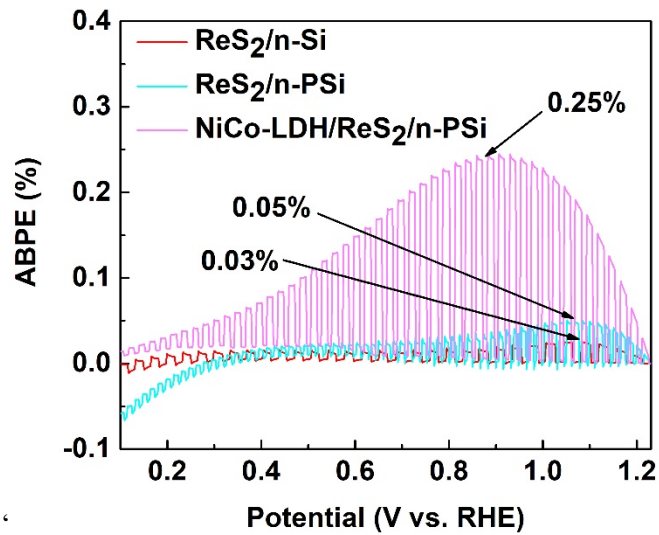

**Figure S4.** Photoconversion efficiency as a function of applied potential.

**Table S1.** A series of parameters of Si-based photoanodes in the published references and this work.

| <b>Samples</b>                                                 | <b>Substrates</b> | <b>Morphology</b>      | <b>Electrolyte</b>                                                | <b>Photocurrent density (mA cm<sup>-2</sup>) at 0 V VS. RHE</b> | <b>ABPE(%)</b> | <b>Ref.</b>      |
|----------------------------------------------------------------|-------------------|------------------------|-------------------------------------------------------------------|-----------------------------------------------------------------|----------------|------------------|
| NiCo <sub>2</sub> O <sub>4</sub> /a-C/Si                       | Planar Si         | Film                   | 1 M NaOH                                                          | 0.59                                                            | Not mentioned  | 1                |
| $\alpha$ -Fe <sub>2</sub> O <sub>3</sub> /TiO <sub>2</sub> /Si | Si NWs            | Hierarchical structure | 0.35 M Na <sub>2</sub> SO <sub>3</sub> + 0.24 M Na <sub>2</sub> S | 3.5                                                             | Not mentioned  | 2                |
| Bi <sub>2</sub> O <sub>3</sub> /Si                             | Si NWs            | Core-shell structure   | 1 M NaOH                                                          | 1.5                                                             | 0.23           | 3                |
| TiO <sub>2</sub> /Si                                           | Si NWs            | Branched structure     | 0.25 M Na <sub>2</sub> SO <sub>4</sub>                            | 0.35                                                            | Not mentioned  | 4                |
| AuNPs@ZnO/Si                                                   | Si NWs            | Core-shell structure   | 0.5 M Na <sub>2</sub> SO <sub>4</sub>                             | 0.12                                                            | Not mentioned  | 5                |
| NiO <sub>x</sub> /n-Si                                         | Planar Si         | Film                   | 1 M NaOH                                                          | 1.0                                                             | Not mentioned  | 6                |
| Ni(Fe)O <sub>x</sub> /Ta <sub>3</sub> N <sub>5</sub> /Si       | Si NWs            | Core-shell structure   | 1 M NaOH                                                          | 2.4                                                             | Not mentioned  | 7                |
| Co <sub>3</sub> O <sub>4</sub> /TiO <sub>2</sub> /Si           | Planar Si         | MOFs-derived Nanorod   | 1 M NaOH                                                          | 2.71                                                            | 0.54           | 8                |
| NiCo-LDH/ReS <sub>2</sub> /n-PSi                               | Pyramidal Si      | 3D Nanosheets          | 0.5 M Na <sub>2</sub> SO <sub>4</sub>                             | 1.74                                                            | 0.25           | <b>This work</b> |

## Reference

- 1 Z. Liu, C. Zhen, D. Xu, X. Wu, H. Wang, L. Ma, D. Zhao, Z. Tian and D. Hou, *Applied Surface Science*, 2020, **529**, 147155.
- 2 W. Zhang, H. Chen, L. Zhang, P. Zhang, E. Dong, J. Ma and G. Wang, *Journal of Alloys and Compounds*, 2019, **773**, 597–604.
- 3 B. Weng, F. Xu and J. Xu, *Nanotechnology*, 2014, **25**, 455402.
- 4 S. Y. Noh, K. Sun, C. Choi, M. Niu, M. Yang, K. Xu, S. Jin and D. Wang, *Nano Energy*, 2013, **2**, 351–360.
- 5 F.-Q. Zhang, Y. Hu, R.-N. Sun, H. Fu and K.-Q. Peng, *Front. Chem.*, 2019, **7**, 206.
- 6 L. He, W. Zhou, D. Cai, S. S. Mao, K. Sun and S. Shen, *Catal. Sci. Technol.*, 2017, **7**, 2632–2638.
- 7 I. Narkeviciute, P. Chakthranont, A. J. M. Mackus, C. Hahn, B. A. Pinaud, S. F. Bent and T. F. Jaramillo, *Nano Lett.*, 2016, **16**, 7565–7572.
- 8 R. Tang, S. Zhou, Z. Yuan and L. Yin, *Adv. Funct. Mater.*, 2017, **27**, 1701102.
